# Supplementary material for: A Systematic Screen for Micro-RNAs Regulating the Canonical Wnt Pathway
Source: PLoS One. 2011 Oct 17;6(10):e26257. doi: 10.1371/journal.pone.0026257 (PMC3197157; doi:10.1371/journal.pone.0026257)
Supplement: Figure S9 — Primary screen data including Nexp (STF-19x/CMV-renilla), p-values, standard deviation, averaged Nexp-values and list of estimated regulatory miRs. A graph illustrates validated miRs within the whole screen data (Nexp values). (XLSX) [file pone.0026257.s009.xlsx]

## Sheet: Primary Screen
	Wnt3a-CM/Pre-miR™ primary scfreen results
								induced>0.65(red)
	Nexp=(FF-STF19x/RL-CMV)							reduced<0.30(green)
											LTS validation	LTS validation
No.	miR annotation	Nexp	Nexp	Nexp	Nexp	p-value	STDEV	average	validation		n=18 Wnt-activators	verified list (Fig1B)
1	hsa-miR-613	0.112558	0.119143	0.174733	0.151951	4.29603e-06	0.0290783	0.139596	validated		n=20 Wnt-repressors	verified list (Fig1B)
2	hsa-miR-221	0.104818	0.169431	0.244234	0.166546	0.000736111	0.0570536	0.171257	validated
3	hsa-miR-139	0.12549	0.210883	0.186001	0.249022	0.000583411	0.0518484	0.192849	validated
4	hsa-miR-610	0.210022	0.240761	0.206714	0.152757	7.37858e-05	0.0365726	0.202563
5	hsa-miR-617	0.171693	0.190601	0.323831	0.161422	0.00394809	0.0756016	0.211887	validated
6	hsa-miR-605	0.187314	0.328412	0.200955	0.145673	0.00481174	0.0788056	0.215589
7	hsa-miR-223	0.175232	0.239923	0.204632	0.268017	0.00020443	0.0405288	0.221951	validated
8	hsa-miR-23b	0.24775	0.261131	0.253275	0.135937	0.00169699	0.0593121	0.224523
9	hsa-miR-1	0.267875	0.201581	0.154225	0.275939	0.00150448	0.0577076	0.224905	validated
10	hsa-miR-140	0.247515	0.210564	0.182054	0.26625	0.000133757	0.0376433	0.226596
11	hsa-miR-9*	0.214297	0.197247	0.25205	0.251132	1.2007e-05	0.0273564	0.228681	validated
12	hsa-miR-28	0.166556	0.251206	0.303025	0.201284	0.00186918	0.0595288	0.230518	validated
13	hsa-miR-422b	0.202647	0.220202	0.270848	0.232926	1.98783e-05	0.0289274	0.231656	validated
14	hsa-miR-134	0.199492	0.284865	0.191195	0.259756	0.000515747	0.0457294	0.233827	validated
15	hsa-miR-608	0.140048	0.206959	0.348588	0.243858	0.00861876	0.0871451	0.234863
16	hsa-miR-612	0.25244	0.197398	0.283901	0.211543	0.000213864	0.0393811	0.236321
17	hsa-miR-25	0.232674	0.222392	0.24515	0.279613	8.34454e-06	0.0249072	0.244957	validated
18	hsa-miR-138	0.239031	0.255352	0.308813	0.194017	0.000803149	0.0473994	0.249303
19	hsa-miR-24	0.242799	0.217901	0.282382	0.256928	1.68461e-05	0.0269492	0.250003
20	hsa-miR-141	0.258059	0.29786	0.295661	0.154711	0.00413129	0.0671083	0.251573
21	hsa-miR-136	0.209733	0.262044	0.225856	0.315061	0.000788652	0.0466977	0.253173	validated
22	hsa-miR-602	0.275258	0.277126	0.276348	0.184691	0.00070936	0.0457831	0.253356
23	hsa-miR-23a	0.193366	0.273866	0.181375	0.383924	0.0144279	0.0933765	0.258133	validated
24	hsa-miR-412	0.175425	0.29358	0.266315	0.311093	0.00309066	0.0603342	0.261603
25	hsa-miR-142-5p	0.27099	0.289963	0.353774	0.132114	0.0151067	0.0933726	0.26171
26	hsa-miR-126	0.127874	0.285475	0.403486	0.230574	0.0280233	0.114814	0.261852	validated
27	hsa-miR-335	0.213184	0.365105	0.161261	0.320218	0.0160989	0.0940157	0.264942	validated
28	hsa-miR-150	0.179946	0.234944	0.362207	0.284868	0.00853921	0.0774176	0.265491	validated
29	hsa-miR-520d*	0.201465	0.220785	0.418053	0.22644	0.0207903	0.101477	0.266686
30	hsa-miR-219	0.196812	0.402901	0.204502	0.27137	0.0177464	0.0954045	0.268896
31	hsa-miR-27a	0.14873	0.308763	0.209971	0.409323	0.0303055	0.11434	0.269197	validated
32	hsa-miR-410	0.166099	0.346031	0.310643	0.264834	0.00958687	0.0779747	0.271902
33	hsa-miR-375	0.299519	0.236888	0.257011	0.296309	7.25888e-05	0.0305775	0.272432	validated
34	hsa-miR-520g	0.338834	0.20942	0.24812	0.300152	0.00293105	0.0569433	0.274132
35	hsa-miR-193b	0.391515	0.312396	0.174281	0.222366	0.0199193	0.0964175	0.27514
36	hsa-miR-409-5p	0.185086	0.274401	0.355202	0.286171	0.00679229	0.0698613	0.275215
37	hsa-miR-607	0.305582	0.23617	0.301372	0.257968	0.000159036	0.0338048	0.275273
38	hsa-miR-96	0.220433	0.154912	0.44206	0.287923	0.0405056	0.123109	0.276332
39	hsa-miR-212	0.323883	0.284193	0.239526	0.26125	0.000257547	0.0360644	0.277213
40	hsa-miR-222	0.292013	0.293407	0.326131	0.200513	0.00247	0.0540204	0.278016
41	hsa-miR-433	0.230686	0.356931	0.256695	0.28299	0.00272864	0.0544335	0.281825
42	hsa-miR-30b	0.302651	0.183171	0.290801	0.355174	0.00860016	0.0721619	0.282949
43	hsa-miR-218	0.166429	0.537624	0.153359	0.27709	0.106907	0.178197	0.283626	validated
44	hsa-miR-409-3p	0.344393	0.311241	0.292393	0.190149	0.00652482	0.0664995	0.284544
45	hsa-miR-224	0.329758	0.328124	0.271551	0.216224	0.00286397	0.0540555	0.286414
46	hsa-miR-615	0.406844	0.288351	0.196198	0.256209	0.0181106	0.0886144	0.286901
47	hsa-miR-142-3p	0.27782	0.249396	0.262329	0.366997	0.00279495	0.0531924	0.289136
48	hsa-miR-220	0.211881	0.340639	0.246753	0.369745	0.0113827	0.0750023	0.292254
49	hsa-miR-215	0.280377	0.300798	0.371019	0.221905	0.00560277	0.0615371	0.293525
50	hsa-miR-520h	0.313818	0.349809	0.278527	0.234912	0.00211531	0.0491186	0.294266
51	hsa-miR-421	0.114955	0.410843	0.494582	0.158097	0.131807	0.186557	0.294619
52	hsa-miR-18b	0.306454	0.331069	0.344211	0.231314	0.00285871	0.0504537	0.303262
53	hsa-miR-339	0.267114	0.452948	0.263366	0.237425	0.0332991	0.0993706	0.305213
54	hsa-miR-611	0.27286	0.419705	0.197031	0.332259	0.0286372	0.0941449	0.305464
55	hsa-miR-452	0.21078	0.310547	0.168601	0.543094	0.122978	0.16749	0.308255
56	hsa-miR-30a-5p	0.455247	0.304961	0.197332	0.300764	0.0458928	0.106172	0.314576
57	hsa-miR-614	0.364565	0.30941	0.27433	0.312163	0.000741723	0.037193	0.315117
58	hsa-miR-383	0.232366	0.223594	0.264961	0.541825	0.109422	0.151806	0.315686
59	hsa-miR-181a	0.244505	0.325069	0.262372	0.431872	0.0246827	0.0846483	0.315955
60	hsa-miR-422a	0.267122	0.287676	0.321771	0.388381	0.0046622	0.0531146	0.316237
61	hsa-miR-411	0.278229	0.237214	0.495068	0.261818	0.0649066	0.119188	0.318082
62	hsa-miR-205	0.146917	0.536508	0.257701	0.335485	0.134268	0.164268	0.319153
63	hsa-miR-193a	0.127086	0.532261	0.178939	0.445784	0.194264	0.198315	0.321017
64	hsa-miR-629	0.229952	0.383113	0.325812	0.345433	0.0114816	0.0652374	0.321077
65	hsa-miR-564	0.245438	0.391735	0.346453	0.311732	0.00987241	0.0616834	0.32384
66	hsa-miR-609	0.386023	0.260482	0.196432	0.460382	0.0728713	0.119362	0.32583
67	hsa-miR-29b	0.328968	0.436753	0.160664	0.383974	0.0752397	0.119669	0.32759
68	hsa-miR-501	0.493965	0.380358	0.285178	0.151621	0.116188	0.145177	0.32778
69	hsa-miR-92	0.413752	0.308609	0.223072	0.368222	0.0281577	0.0823742	0.328414
70	hsa-miR-515-5p	0.237738	0.356921	0.37595	0.343283	0.0110055	0.0619557	0.328473
71	hsa-let-7g	0.171128	0.209132	0.493438	0.44415	0.149498	0.162881	0.329462
72	hsa-miR-520d	0.346008	0.293121	0.358808	0.325026	0.000223349	0.0286867	0.330741
73	hsa-miR-625	0.379942	0.295571	0.315013	0.338351	0.00100654	0.0363053	0.332219
74	hsa-miR-18a	0.213318	0.442562	0.204214	0.471277	0.121811	0.143799	0.332843
75	hsa-miR-296	0.202477	0.477621	0.37016	0.28251	0.0793704	0.118154	0.333192
76	hsa-miR-542-3p	0.140804	0.492626	0.288145	0.417232	0.143943	0.154397	0.334702
77	hsa-miR-521	0.289836	0.378351	0.3832	0.288115	0.00690866	0.0530424	0.334875
78	hsa-miR-652	0.511145	0.277601	0.252814	0.300555	0.0830992	0.118689	0.335529
79	hsa-miR-616	0.304347	0.323867	0.359562	0.360417	0.000217721	0.0276651	0.337048
80	hsa-miR-769-5p	0.283545	0.550703	0.263986	0.250678	0.127679	0.142956	0.337228
81	hsa-miR-626	0.469931	0.393535	0.266292	0.220191	0.0791543	0.11476	0.337487
82	hsa-miR-651	0.284457	0.501463	0.297557	0.266794	0.0716113	0.109988	0.337568
83	hsa-miR-620	0.503354	0.327104	0.230638	0.290034	0.083715	0.117314	0.337783
84	hsa-miR-324-5p	0.637083	0.261512	0.177018	0.277252	0.243002	0.204048	0.338216
85	hsa-miR-148b	0.310405	0.336173	0.284079	0.427746	0.0142914	0.0624936	0.339601
86	hsa-miR-192	0.186039	0.356548	0.339498	0.478717	0.0915536	0.120028	0.3402
87	hsa-miR-527	0.269829	0.307171	0.522246	0.261816	0.0966771	0.12292	0.340265
88	hsa-miR-143	0.175537	0.597967	0.391215	0.207659	0.238037	0.194674	0.343094
89	hsa-miR-20b	0.334861	0.193868	0.488452	0.357688	0.0977789	0.12066	0.343717
90	hsa-let-7a	0.197572	0.357984	0.31604	0.504179	0.108967	0.126591	0.343944
91	hsa-miR-199a*	0.253303	0.576397	0.237894	0.311819	0.170462	0.157613	0.344853
92	hsa-miR-26a	0.295339	0.336017	0.219773	0.535964	0.129941	0.13501	0.346773
93	hsa-miR-217	0.411676	0.472282	0.215201	0.29799	0.0957833	0.114936	0.349287
94	hsa-miR-519e*	0.172567	0.469709	0.372549	0.385748	0.118415	0.125962	0.350143
95	hsa-miR-211	0.204711	0.434911	0.328326	0.436112	0.0889219	0.109848	0.351015
96	hsa-miR-624	0.476497	0.333405	0.424915	0.17401	0.135929	0.132718	0.352207
97	hsa-miR-130b	0.222782	0.256994	0.361635	0.570461	0.187156	0.156565	0.352968
98	hsa-miR-561	0.395062	0.197005	0.371252	0.448925	0.0903996	0.108993	0.353061
99	hsa-miR-655	0.574865	0.301621	0.237888	0.299305	0.175652	0.150551	0.35342
100	hsa-miR-153	0.184102	0.370738	0.305708	0.55372	0.183739	0.154235	0.353567
101	hsa-miR-599	0.268188	0.262591	0.450883	0.43565	0.0808478	0.102911	0.354328
102	hsa-miR-590	0.175734	0.53611	0.478182	0.231226	0.238693	0.178354	0.355313
103	hsa-miR-432	0.442978	0.370145	0.25375		0.13755	0.0954464	0.355624
104	hsa-miR-132	0.254357	0.198128	0.656738	0.31408	0.295617	0.206119	0.355826
105	hsa-miR-565	0.484129	0.356642	0.270869	0.317256	0.0640889	0.0915781	0.357224
106	hsa-miR-604	0.40355	0.437425	0.293715	0.299346	0.0353213	0.0729267	0.358509
107	hsa-miR-423	0.316125	0.532852	0.224769	0.365027	0.144429	0.129248	0.359693
108	hsa-miR-329	0.240451	0.465704	0.404016	0.328606	0.0778933	0.0972763	0.359694
109	hsa-miR-148a	0.362437	0.346282	0.357941	0.374741	9.77306e-05	0.011764	0.36035
110	hsa-miR-568	0.292359	0.344635	0.322573	0.486083	0.0589155	0.0858318	0.361412
111	hsa-miR-525*	0.271077	0.409179	0.356909	0.412611	0.0285346	0.066029	0.362444
112	hsa-miR-22	0.202835	0.778759	0.218293	0.252438	0.441341	0.277892	0.363081
113	hsa-miR-627	0.278489	0.36956	0.442036		0.1166	0.0819497	0.363362
114	hsa-miR-640	0.346862	0.244039	0.389251	0.475073	0.0815684	0.096019	0.363806
115	hsa-miR-30e-5p	0.34458	0.304046	0.335407	0.471681	0.0413271	0.0739013	0.363929
116	hsa-miR-548c	0.366998	0.260295	0.481148	0.359412	0.0748595	0.0903204	0.366963
117	hsa-miR-144	0.559324	0.296071	0.287746	0.330658	0.163939	0.128599	0.36845
118	hsa-miR-210	0.316681	0.290307	0.49165	0.381317	0.0781672	0.0896672	0.369989
119	hsa-miR-187	0.401579	0.364651	0.525549	0.191	0.19296	0.138155	0.370695
120	hsa-miR-33	0.322005	0.271668	0.353539	0.541943	0.148282	0.118021	0.372289
121	hsa-miR-601	0.434203	0.361563	0.358094	0.336898	0.00737545	0.0424332	0.37269
122	hsa-miR-27b	0.365285	0.346444	0.302432	0.47675	0.0509283	0.0741808	0.372728
123	hsa-miR-622	0.386334	0.334156	0.527343	0.255453	0.148454	0.114446	0.375822
124	hsa-miR-520c	0.363821	0.396798	0.434517	0.309998	0.0193915	0.0527923	0.376283
125	hsa-miR-650	0.390552	0.344355	0.308888	0.463986	0.0422487	0.0669702	0.376945
126	hsa-miR-29c	0.401818	0.230078	0.346656	0.531781	0.181003	0.125271	0.377583
127	hsa-miR-380-3p	0.42768	0.42824	0.38512	0.270084	0.0581242	0.0745844	0.377781
128	hsa-miR-623	0.287017	0.295452	0.456971	0.473899	0.120402	0.100871	0.378335
129	hsa-miR-770-5p	0.219048	0.292707	0.665827	0.336452	0.356099	0.197577	0.378508
130	hsa-miR-152	0.276554	0.42104	0.513987	0.305987	0.144545	0.109262	0.379392
131	hsa-miR-637	0.428571	0.278513	0.468936	0.346147	0.0861003	0.0850744	0.380542
132	hsa-miR-451	0.317749	0.427807	0.327106	0.449731	0.0481087	0.0678713	0.380598
133	hsa-miR-188	0.564253	0.341685	0.359135	0.260531	0.203321	0.129251	0.381401
134	hsa-miR-768-5p	0.333619	0.329914	0.406677	0.455758	0.0357296	0.0608329	0.381492
135	hsa-miR-191	0.338169	0.493215	0.492095	0.202861	0.231269	0.139643	0.381585
136	hsa-miR-127	0.554397	0.258188	0.38634	0.338031	0.201667	0.125143	0.384239
137	hsa-miR-630	0.319385	0.50625	0.335485	0.376254	0.0927454	0.0847222	0.384344
138	hsa-miR-137	0.265021	0.545665	0.448745	0.27841	0.232281	0.136176	0.38446
139	hsa-miR-324-3p	0.278746	0.420935	0.614261	0.226413	0.328782	0.173486	0.385089
140	hsa-miR-206	0.550921	0.270045	0.322761	0.398725	0.198212	0.122209	0.385613
141	hsa-miR-526b	0.246034	0.383263	0.462621	0.453181	0.138172	0.0999696	0.386275
142	hsa-miR-133b	0.399624	0.45583	0.453805	0.237268	0.147422	0.102922	0.386632
143	hsa-miR-545	0.176168	0.443874	0.477418	0.452356	0.257904	0.141575	0.387454
144	hsa-miR-635	0.310287	0.524671	0.278682	0.447459	0.195858	0.115734	0.390275
145	hsa-miR-384	0.219102	0.455976	0.281105	0.607901	0.359448	0.175968	0.391021
146	hsa-miR-190	0.222889	0.614098	0.455476	0.273405	0.368208	0.178903	0.391467
147	hsa-miR-593	0.697546	0.305956	0.270396	0.294752	0.425682	0.20413	0.392163
148	hsa-miR-595	0.471482	0.323417	0.265003	0.523852	0.235225	0.121754	0.395938
149	hsa-miR-765	0.409993	0.284983	0.54812	0.341638	0.21089	0.113455	0.396183
150	hsa-miR-455	0.518354	0.195612	0.378244	0.494835	0.312777	0.14743	0.396761
151	hsa-miR-135a	0.289905	0.409744	0.455697	0.432052	0.090424	0.073724	0.396849
152	hsa-miR-646	0.356937	0.488425	0.335185	0.41405	0.0793079	0.06847	0.398649
153	hsa-miR-657	0.241685	0.480363	0.523686	0.348967	0.266679	0.128345	0.398675
154	hsa-miR-331	0.179891	0.515906	0.498431	0.402243	0.342593	0.154459	0.399118
155	hsa-miR-489	0.13386	0.433232	0.577867	0.451627	0.424095	0.188179	0.399146
156	hsa-miR-518b	0.28262	0.47332	0.24913	0.592077	0.363171	0.162077	0.399287
157	hsa-let-7e	0.346022	0.370487	0.407714	0.47866	0.0539168	0.0578198	0.400721
158	hsa-miR-520a*	0.354035	0.359238	0.370567	0.522498	0.125514	0.0809042	0.401585
159	hsa-miR-524	0.348187	0.611329	0.354558	0.292395	0.321892	0.142569	0.401617
160	hsa-miR-191*	0.442023	0.653679	0.349864	0.162943	0.471114	0.203969	0.402127
161	hsa-miR-518c	0.292399	0.469152	0.310075	0.536991	0.256528	0.119992	0.402154
162	hsa-miR-26b	0.350334	0.42167	0.370214	0.480329	0.0640569	0.058164	0.405637
163	hsa-miR-452*	0.257475	0.447094	0.52552	0.394716	0.251845	0.112784	0.406201
164	hsa-miR-16	0.373811	0.259259	0.596193	0.398347	0.340901	0.139997	0.406902
165	hsa-miR-450	0.325284	0.323971	0.524792	0.45773	0.215968	0.100027	0.407945
166	hsa-miR-135b	0.514658	0.404748	0.347934	0.370486	0.127245	0.0739215	0.409456
167	hsa-miR-200a	0.475572	0.709281	0.277266	0.176106	0.562104	0.235367	0.409556	validated
168	hsa-miR-654	0.34433	0.683376	0.409122	0.210487	0.510154	0.199031	0.411829
169	hsa-miR-328	0.247784	0.520559	0.543335	0.336268	0.378362	0.143453	0.411986
170	hsa-miR-448	0.427604	0.321056	0.276998	0.624942	0.414053	0.155008	0.41265
171	hsa-miR-618	0.234886	0.598656	0.509151	0.309098	0.452387	0.169542	0.412948
172	hsa-miR-29a	0.654701	0.251359	0.392638	0.356254	0.461324	0.171444	0.413738
173	hsa-miR-189	0.257999	0.521083	0.571792	0.306339	0.424056	0.155233	0.414303
174	hsa-miR-580	0.384035	0.447546	0.391689	0.44247	0.0160594	0.0332057	0.416435
175	hsa-miR-30a-3p	0.308296	0.650863	0.393065	0.316347	0.454051	0.160429	0.417142
176	hsa-miR-151	0.516286	0.336287	0.40406		0.327568	0.0909095	0.418878
177	hsa-miR-518e	0.343163	0.401966	0.499128	0.43344	0.129794	0.0649863	0.419424
178	hsa-miR-767-5p	0.37804	0.410277	0.580655	0.311023	0.334165	0.114806	0.419999
179	hsa-miR-600	0.275406	0.489825	0.341123	0.575272	0.408724	0.136764	0.420407
180	hsa-miR-518f*	0.424255	0.392631	0.467554	0.39954	0.0220756	0.0338784	0.420995
181	hsa-miR-429	0.296874	0.604949	0.316976	0.470298	0.442681	0.144325	0.422274
182	hsa-miR-133a	0.422862	0.748346	0.277412	0.243531	0.622483	0.230402	0.423038
183	hsa-miR-520e	0.553675	0.393419	0.271051	0.480819	0.388686	0.121615	0.424741
184	hsa-miR-495	0.253241	0.578595	0.599008	0.269405	0.565645	0.189368	0.425062
185	hsa-miR-376b	0.258767	0.269379	0.559275	0.615808	0.567928	0.188225	0.425807
186	hsa-miR-454-5p	0.360917	0.489158	0.392681	0.463477	0.138251	0.0598276	0.426558
187	hsa-miR-95	0.404139	0.552576	0.366267	0.383867	0.25928	0.085324	0.426712
188	hsa-miR-494	0.205008	0.479055	0.752352	0.277243	0.670179	0.245128	0.428415
189	hsa-miR-485-5p	0.46953	0.472742	0.397372	0.376606	0.0991257	0.0493338	0.429063
190	hsa-miR-648	0.497916	0.400525	0.26785	0.558375	0.451579	0.126818	0.431167
191	hsa-miR-598	0.556483	0.48413	0.369586	0.315767	0.391915	0.108962	0.431491
192	hsa-miR-367	0.486126	0.360183	0.558546	0.32119	0.396418	0.11012	0.431511
193	hsa-miR-297	0.627161	0.415122	0.348583	0.340417	0.48545	0.13381	0.432821
194	hsa-miR-9	0.515144	0.706291	0.191859	0.318007	0.669326	0.22569	0.432825
195	hsa-miR-185	0.310997	0.603492	0.294093	0.524006	0.543067	0.154413	0.433147
196	hsa-miR-128a	0.263064	0.691122	0.414382	0.365445	0.606204	0.182952	0.433503
197	hsa-miR-198	0.198922	0.537378	0.638707	0.365456	0.635496	0.19369	0.435116
198	hsa-miR-373	0.453524	0.441433	0.439223	0.406375	0.0104207	0.0201795	0.435139
199	hsa-miR-330	0.670456	0.260846	0.355314	0.45594	0.606515	0.175647	0.435639
200	hsa-miR-606	0.370847	0.630405	0.349271	0.392925	0.50018	0.130914	0.435862
201	hsa-miR-579	0.255101	0.36738	0.540042	0.586286	0.570749	0.153664	0.437202
202	hsa-miR-154	0.436488	0.275925	0.63414	0.403924	0.560781	0.148214	0.437619
203	hsa-miR-326	0.202202	0.333434	0.612871	0.607238	0.676687	0.204738	0.438936
204	hsa-miR-15a	0.51672	0.484441	0.351103	0.41553	0.320983	0.0738179	0.441949
205	hsa-miR-520b	0.41152	0.545232	0.358995	0.453849	0.351629	0.0787726	0.442399
206	hsa-miR-513	0.436075	0.539745	0.330452	0.466481	0.399227	0.0868445	0.443188
207	hsa-miR-425-5p	0.447588	0.444041	0.393531	0.490131	0.120492	0.0395304	0.443823
208	hsa-miR-31	0.685984	0.479614	0.34844	0.269059	0.688399	0.182161	0.445774
209	hsa-miR-597	0.417895	0.491214	0.668764	0.205434	0.703117	0.191772	0.445827
210	hsa-miR-431	0.326413	0.547131	0.383569	0.535427	0.542496	0.110159	0.448135
211	hsa-miR-574	0.49222	0.466687	0.502006	0.338935	0.413893	0.0755008	0.449962
212	hsa-miR-492	0.612104	0.230085	0.630456	0.332163	0.751435	0.200902	0.451202
213	hsa-miR-155	0.280832	0.451258	0.43687	0.636759	0.667555	0.145674	0.45143
214	hsa-miR-10b	0.351077	0.209049	0.753372	0.493311	0.786376	0.232194	0.451702
215	hsa-miR-661	0.511684	0.379891	0.358622	0.562931	0.56001	0.0996334	0.453282
216	hsa-miR-302c*	0.30779	0.564061	0.313064	0.628999	0.723117	0.167309	0.453479
217	hsa-miR-197	0.18819	0.596493	0.397115	0.632364	0.771662	0.204945	0.453541
218	hsa-miR-99a	0.452272	0.43312	0.530356	0.398556	0.335765	0.0558047	0.453576
219	hsa-miR-425-3p	0.352218	0.784354	0.322625	0.357007	0.790483	0.220726	0.454051
220	hsa-miR-634	0.603203	0.382013	0.368012	0.466535	0.606692	0.107999	0.454941
221	hsa-miR-656	0.409443	0.246267	0.65676	0.507296	0.742007	0.172324	0.454941
222	hsa-miR-149	0.259485	0.690164	0.379604	0.493223	0.76147	0.183187	0.455619
223	hsa-miR-125b	0.605758	0.422603	0.507612	0.287643	0.685734	0.134846	0.455904
224	hsa-miR-128b	0.267654	0.630928	0.313452	0.614104	0.779186	0.192691	0.456535
225	hsa-miR-181a*	0.415896	0.829647	0.220541	0.362537	0.839007	0.261656	0.457155
226	hsa-miR-548d	0.315979	0.546215	0.294834	0.673394	0.776632	0.183457	0.457605
227	hsa-miR-587	0.419411	0.516481	0.397415	0.5	0.422919	0.0587177	0.458327
228	hsa-miR-33b	0.501974	0.643796	0.171588	0.51845	0.805372	0.201772	0.458952
229	hsa-miR-299-5p	0.212209	0.673159	0.67662	0.274593	0.843259	0.250422	0.459145
230	hsa-miR-644	0.617192	0.486586	0.495534	0.241725	0.76469	0.157398	0.460259
231	hsa-miR-649	0.615014	0.363129	0.397618	0.466083	0.678894	0.111566	0.460461
232	hsa-miR-518d	0.213189	0.738139	0.536124	0.35583	0.838156	0.227245	0.46082
233	hsa-miR-596	0.634427	0.307726	0.411428	0.490996	0.741939	0.137752	0.461144
234	hsa-miR-558	0.627389	0.368223	0.398451	0.450812	0.698241	0.115915	0.461219
235	hsa-miR-653	0.725039	0.450065	0.352663	0.321561	0.812463	0.183493	0.462332
236	hsa-miR-338	0.635238	0.364257	0.47138	0.37973	0.732388	0.124391	0.462651
237	hsa-miR-659	0.451209	0.545595	0.648694	0.208858	0.826217	0.187998	0.463589
238	hsa-miR-591	0.313993	0.350538	0.572149	0.618584	0.791251	0.153805	0.463816
239	hsa-miR-302b*	0.417377	0.364953	0.396711	0.67705	0.779204	0.143646	0.464023
240	hsa-miR-584	0.298709	0.295088	0.613233	0.656884	0.85046	0.196054	0.465978
241	hsa-miR-569	0.619255	0.691806	0.191629	0.366555	0.880786	0.230678	0.467311
242	hsa-miR-520f	0.624022	0.470979	0.348888	0.425459	0.768622	0.11597	0.467337
243	hsa-miR-517*	0.449268	0.430289	0.290777	0.702069	0.847004	0.17124	0.468101
244	hsa-let-7f	0.440052	0.516807	0.297841	0.618151	0.808657	0.134985	0.468213
245	hsa-miR-204	0.242181	0.660132	0.478019	0.492994	0.849473	0.171885	0.468332
246	hsa-miR-645	0.462279	0.484516	0.70882	0.21857	0.87199	0.200428	0.468546
247	hsa-miR-514	0.452308	0.428568	0.647999	0.346384	0.804921	0.127787	0.468815
248	hsa-miR-493-5p	0.429706	0.385932	0.460852	0.602078	0.750235	0.0934856	0.469642
249	hsa-miR-520a	0.277261	0.536693	0.49259	0.576179	0.83241	0.13339	0.470681
250	hsa-let-7b	0.687515	0.338591	0.305027	0.55381	0.880185	0.181489	0.471236
251	hsa-miR-621	0.552278	0.574492	0.266294	0.500117	0.867984	0.141478	0.473295
252	hsa-miR-92b	0.741351	0.251487	0.370782	0.532428	0.916231	0.212176	0.474012
253	hsa-miR-184	0.468395	0.301977	0.338561	0.789579	0.923863	0.221777	0.474628
254	hsa-miR-497	0.710776	0.401335	0.523053	0.267383	0.918294	0.188352	0.475637
255	hsa-miR-376a*	0.265058	0.309655	0.682352	0.646127	0.930645	0.218854	0.475798
256	hsa-miR-18a*	0.446195	0.640061	0.529985	0.294993	0.916222	0.145452	0.477809
257	hsa-miR-376a	0.331753	0.568585	0.527248	0.484521	0.886133	0.103379	0.478027
258	hsa-miR-505	0.263775	0.538667	0.385842	0.724312	0.940997	0.198944	0.478149
259	hsa-miR-103	0.241239	0.478678	0.713111	0.481534	0.94281	0.192652	0.47864
260	hsa-abi-4983, hsa-miR-660	0.532076	0.470603	0.622022	0.292518	0.928102	0.139186	0.479305
261	hsa-miR-517c	0.421338	0.253459	0.416777	0.828818	0.963695	0.245243	0.480098
262	hsa-miR-571	0.334109	0.511569	0.553649	0.527008	0.933427	0.0998408	0.481584
263	hsa-miR-522	0.508896	0.640222	0.511435	0.268966	0.964238	0.154927	0.48238
264	hsa-miR-129	0.251526	0.303717	0.65772	0.719765	0.981714	0.239658	0.483182
265	hsa-miR-374	0.431883	0.375174	0.695398	0.43078	0.970945	0.143851	0.483309
266	hsa-miR-101	0.649768	0.560423	0.178243	0.545853	0.981752	0.208672	0.483572
267	hsa-miR-589	0.337568	0.560845	0.744014	0.293903	0.985363	0.209039	0.484082
268	hsa-miR-663	0.36015	0.381438	0.948588	0.255633	0.998672	0.312958	0.486453
269	hsa-miR-202*	0.305416	0.236984	0.694883	0.708991	0.997661	0.250317	0.486569
270	hsa-miR-299-3p	0.555618	0.395379	0.479984	0.516264	0.986558	0.0683334	0.486811
271	hsa-miR-758	0.636455	0.369876	0.321854	0.619358	0.993613	0.164161	0.486886
272	hsa-miR-216	0.496693	0.318956	0.411598	0.72569	0.982645	0.17415	0.488234
273	hsa-miR-203	0.557771	0.219002	0.485241	0.69666	0.974446	0.200635	0.489668
274	hsa-miR-145	0.84041	0.266856	0.531093	0.320564	0.979911	0.260113	0.489731
275	hsa-miR-498	0.588602	0.673561	0.535863	0.168254	0.964484	0.222883	0.49157
276	hsa-miR-196b	0.39776	0.564034	0.51783	0.490628	0.870118	0.0700902	0.492563
277	hsa-miR-675	0.606021	0.30944	0.559275	0.496656	0.925321	0.130222	0.492848
278	hsa-miR-553	0.19006	0.415672	0.560806	0.805361	0.961339	0.258147	0.492975
279	hsa-miR-582	0.437957	0.363557	0.698788	0.479842	0.910366	0.144095	0.495036
280	hsa-miR-575	0.546743	0.546159	0.39798	0.49603	0.787648	0.069992	0.496728
281	hsa-miR-340	0.315653	0.448089	0.445764	0.781151	0.915534	0.198867	0.497664
282	hsa-miR-503	0.32535	0.296076	0.346405	1.02518	0.949614	0.351893	0.498254
283	hsa-miR-105	0.623227	0.46321	0.570077	0.338178	0.856452	0.126	0.498673
284	hsa-miR-551a	0.449776	0.321091	0.841521	0.382945	0.92096	0.234424	0.498833
285	hsa-miR-194	0.51928	0.613045	0.367963	0.495093	0.820107	0.101	0.498845
286	hsa-miR-549	0.53988	0.482349	0.260955	0.721531	0.884789	0.189837	0.501179
287	hsa-miR-214	0.297341	0.539168	0.757193	0.414401	0.882528	0.196693	0.502026
288	hsa-miR-186	0.380963	0.451177	0.572979	0.611759	0.760251	0.106924	0.504219
289	hsa-miR-378	0.357819	0.986867	0.388484	0.284364	0.917832	0.324609	0.504383
290	hsa-miR-10a	0.872709	0.643109	0.320307	0.187405	0.907114	0.310515	0.505883
291	hsa-miR-767-3p	0.533141	0.617525	0.432751	0.443387	0.671974	0.0865226	0.506701
292	hsa-miR-518a	0.355033	0.713354	0.455687	0.503398	0.802653	0.15091	0.506868
293	hsa-miR-636	0.932673	0.369835	0.390356	0.339975	0.886573	0.28373	0.50821
294	hsa-miR-208	0.504884	0.479426	0.288479	0.762507	0.831526	0.194754	0.508824
295	hsa-miR-181b	0.812	0.554596	0.282374	0.386955	0.856407	0.231043	0.508981
296	hsa-miR-17-5p	0.560492	0.550028	0.237571	0.695054	0.8164	0.193746	0.510786
297	hsa-miR-124a	0.746524	0.3901	0.379454	0.531102	0.784885	0.171069	0.511795
298	hsa-miR-628	0.43748	0.374717	0.531392	0.704196	0.744448	0.143428	0.511946
299	hsa-miR-563	0.587401	0.746476	0.251374	0.464714	0.817741	0.208826	0.512491
300	hsa-miR-17-3p	0.499957	0.691537	0.597341	0.265532	0.784634	0.182937	0.513592
301	hsa-miR-542-5p	0.305921	0.781179	0.430532	0.537554	0.802591	0.201828	0.513796
302	hsa-miR-490	0.451245	0.336354	0.58956	0.682345	0.732453	0.152252	0.514876
303	hsa-miR-454-3p	0.348068	0.701691	0.299247	0.716181	0.805326	0.22341	0.516297
304	hsa-miR-570	0.5051	0.602003	0.510602	0.447723	0.42203	0.0637853	0.516357
305	hsa-miR-365	0.476735	0.719724	0.446616	0.42256	0.69118	0.137344	0.516409
306	hsa-miR-21	0.217402	0.436311	0.485211	0.928619	0.850155	0.298167	0.516886
307	hsa-miR-487b	0.566684	0.803118	0.205062	0.500088	0.808877	0.246246	0.518738
308	hsa-miR-15b	0.39456	0.569896	0.706091	0.407441	0.684064	0.147787	0.519497
309	hsa-miR-668	0.510611	0.575908	0.682906	0.319494	0.67033	0.152682	0.52223
310	hsa-miR-567	0.719425	0.759879	0.305807	0.308423	0.785964	0.250273	0.523383
311	hsa-miR-200c	0.683134	0.688953	0.475768	0.249077	0.739923	0.20852	0.524233
312	hsa-miR-578	0.593431	0.534648	0.301969	0.667895	0.662309	0.158047	0.524486
313	hsa-miR-502	0.690424	0.873796	0.385407	0.1506	0.824256	0.320773	0.525056
314	hsa-miR-20a	0.190233	0.774501	0.545411	0.591404	0.769724	0.244367	0.525387
315	hsa-miR-30c	0.274277	0.613654	0.377552	0.837878	0.773818	0.251894	0.52584
316	hsa-miR-98	0.600434	0.334124	0.474918	0.699446	0.640853	0.15816	0.52723
317	hsa-miR-30d	0.765562	0.568157	0.420452	0.355609	0.681856	0.181964	0.527445
318	hsa-miR-147	0.361373	0.954667	0.416563	0.390216	0.77431	0.283539	0.530705
319	hsa-miR-512-5p	0.664941	0.523132	0.436851	0.497928	0.427618	0.0965394	0.530713
320	hsa-miR-523	0.931226	0.403933	0.376804	0.412446	0.759138	0.267182	0.531102
321	hsa-miR-532	0.342613	0.866167	0.556836	0.36229	0.731607	0.242867	0.531977
322	hsa-miR-381	0.238894	1.09534	0.343251	0.454796	0.82339	0.385075	0.533071
323	hsa-miR-518c*	0.588832	0.615752	0.644311	0.283416	0.616719	0.167976	0.533078
324	hsa-miR-199a	0.539611	0.454706	0.341683	0.800352	0.657922	0.195148	0.534088
325	hsa-miR-643	0.679633	0.539295	0.562316	0.3569	0.522888	0.133419	0.534536
326	hsa-miR-641	0.726465	0.263803	0.604422	0.547588	0.649693	0.195945	0.535569
327	hsa-miR-768-3p	0.453874	0.376934	0.745543	0.57753	0.563339	0.160888	0.53847
328	hsa-miR-362	0.341959	0.852824	0.434482	0.531982	0.660257	0.222319	0.540312
329	hsa-miR-577	0.499173	0.481692	0.766468	0.421231	0.519466	0.153234	0.542141
330	hsa-miR-638	0.831471	0.490137	0.427686	0.420441	0.605659	0.195215	0.542434
331	hsa-miR-766	0.577574	0.408324	0.628377	0.559387	0.315355	0.094675	0.543415
332	hsa-miR-524*	1.02997	0.447206	0.233958	0.472548	0.748688	0.339979	0.545922
333	hsa-miR-449	0.346646	0.711371	0.789941	0.338741	0.646419	0.237733	0.546675
334	hsa-miR-379	0.572317	0.388745	0.834809	0.394757	0.599304	0.20952	0.547657
335	hsa-miR-369-3p	0.4611	0.748483	0.397197	0.587175	0.481425	0.154941	0.548489
336	hsa-miR-583	0.752032	0.545712	0.58539	0.311773	0.541247	0.181506	0.548727
337	hsa-let-7i	0.631194	0.559343	0.282669	0.722325	0.55653	0.189593	0.548883
338	hsa-let-7c	0.4877	0.6478	0.514036	0.55001	0.165756	0.0700939	0.549887
339	hsa-miR-154*	0.296797	1.2208	0.361969	0.320801	0.794025	0.447948	0.550092
340	hsa-miR-603	0.482152	0.61396	0.629937	0.478474	0.211907	0.0820468	0.551131
341	hsa-miR-325	0.397214	0.956193	0.436025	0.415363	0.663951	0.270461	0.551199
342	hsa-miR-199b	0.632704	0.58561	0.534238	0.454911	0.182443	0.0761236	0.551866
343	hsa-miR-126*	0.497726	0.472783	0.356874	0.882553	0.602943	0.228444	0.552484
344	hsa-miR-559	0.632472	0.569339	0.72316	0.293883	0.513435	0.184993	0.554713
345	hsa-miR-483	0.183427	0.585116	0.935529	0.524316	0.676841	0.308058	0.557097
346	hsa-miR-369-5p	0.852642	0.443731	0.676608	0.261311	0.616239	0.259462	0.558573
347	hsa-miR-526b*	0.647038	0.303726	0.516699	0.781733	0.509557	0.203528	0.562299
348	hsa-miR-370	0.488799	0.454564	0.485822	0.824084	0.442824	0.174533	0.563317
349	hsa-miR-342	0.460411	0.826622	0.607157	0.367975	0.48617	0.199983	0.565541
350	hsa-miR-99b	0.857692	0.557495	0.455298	0.398286	0.486941	0.204559	0.567193
351	hsa-miR-518f	0.641598	0.617366	0.593233	0.417294	0.209589	0.101982	0.567373
352	hsa-miR-363*	0.499688	0.701716	0.452075	0.621975	0.242806	0.113864	0.568863
353	hsa-miR-361	0.584318	0.45532	0.707638	0.535192	0.208349	0.105689	0.570617
354	hsa-let-7d	0.56861	1.10862	0.348879	0.263637	0.680741	0.379844	0.572437
355	hsa-miR-7	0.566274	0.725563	0.461576	0.546725	0.20503	0.110167	0.575034
356	hsa-miR-19a	0.773092	0.56479	0.451172	0.514807	0.288721	0.1394	0.575965
357	hsa-miR-769-3p	0.719299	0.752465	0.249962	0.590243	0.482938	0.22961	0.577992
358	hsa-miR-432*	0.405033	0.666386	0.632262	0.617005	0.211023	0.11857	0.580172
359	hsa-miR-377	0.287354	0.802548	0.563393	0.669794	0.451303	0.218713	0.580772
360	hsa-miR-496	0.652607	0.836093	0.396478	0.438298	0.422005	0.203807	0.580869
361	hsa-miR-107	0.306416	0.317278	0.779566	0.937728	0.582467	0.322261	0.585247
362	hsa-miR-562	0.603655	0.694235	0.44162	0.602605	0.154105	0.105114	0.585529
363	hsa-miR-30e-3p	0.628862	0.462578	0.706731	0.556168	0.142575	0.104098	0.588585
364	hsa-miR-453	0.629591	0.797472	0.387255	0.547346	0.310017	0.170818	0.590416
365	hsa-miR-337	0.659335	0.44771	0.688741	0.566356	0.149244	0.108569	0.590535
366	hsa-miR-363	0.61281	0.451211	0.567082	0.734207	0.169601	0.117042	0.591327
367	hsa-miR-548a	0.587715	0.630376	0.475696	0.671857	0.0853217	0.0844462	0.591411
368	hsa-miR-509	0.650017	0.419559	0.537728	0.775192	0.246348	0.152265	0.595624
369	hsa-miR-200b	0.388974	0.921006	0.624284	0.461138	0.411024	0.236251	0.598851
370	hsa-miR-647	0.528138	0.615656	0.978017	0.282968	0.483196	0.287987	0.601195
371	hsa-miR-499	0.774975	1.06748	0.414974	0.148385	0.60755	0.403047	0.601455
372	hsa-miR-202	0.407237	0.830508	0.573029	0.60277	0.271266	0.174146	0.603386
373	hsa-miR-519c	0.550537	0.555818	0.662365	0.656035	0.0246025	0.0613046	0.606189
374	hsa-miR-146a	0.369581	0.930055	0.468199	0.663755	0.397645	0.247127	0.607897
375	hsa-miR-544	0.517573	0.646422	0.559272	0.717132	0.0662614	0.0892933	0.6101
376	hsa-miR-183	1.19519	0.383	0.541639	0.324833	0.576503	0.399986	0.611166
377	hsa-miR-631	0.675241	0.424907	0.944029	0.407131	0.390034	0.252464	0.612827
378	hsa-miR-572	0.59733	0.54471	0.851772	0.462445	0.225111	0.167912	0.614064
379	hsa-miR-632	0.671947	0.606837	0.509185	0.68114	0.0418085	0.0792887	0.617277
380	hsa-miR-182	0.651201	0.599745	0.602927	0.617788	0.00016047	0.0235425	0.617915
381	hsa-miR-801	0.549705	0.660237	0.664001	0.599672	0.0120073	0.0544657	0.618403
382	hsa-miR-301	0.505175	0.743716	0.404864	0.848667	0.26844	0.205699	0.625605
383	hsa-miR-491	0.934041	0.474152	0.37058	0.726348	0.350513	0.253808	0.62628
384	hsa-miR-516-3p	0.804978	0.53327	0.732214	0.43893	0.195546	0.170197	0.627348
385	hsa-miR-588	0.553518	0.642523	0.661855	0.656713	0.00706991	0.0507523	0.628652
386	hsa-miR-554	0.484352	1.11674	0.409457	0.507316	0.446264	0.327526	0.629467
387	hsa-miR-539	0.588167	0.356845	0.821515	0.752216	0.258973	0.206542	0.629686
388	hsa-miR-302b	0.716938	0.8043	0.538036	0.470827	0.154119	0.154603	0.632525
389	hsa-miR-516-5p	0.656673	0.562511	0.721624	0.595318	0.0206557	0.0702354	0.634031
390	hsa-miR-449b	0.649345	0.425327	0.750349	0.726596	0.132169	0.148133	0.637904
391	hsa-miR-488	1.02502	0.665769	0.330341	0.542396	0.366149	0.291155	0.64088
392	hsa-miR-146b	0.484703	0.664217	0.660197	0.75719	0.0698982	0.113776	0.641577
393	hsa-miR-130a	0.62279	0.514841	0.911259	0.521713	0.190435	0.185747	0.642651
394	hsa-miR-581	0.679161	0.588926	0.50264	0.808148	0.0921864	0.130633	0.644719
395	hsa-miR-526c	0.644501	0.330935	0.983062	0.622715	0.318779	0.26672	0.645303
396	hsa-miR-320	0.635828	0.984519	0.420876	0.543651	0.278087	0.242112	0.646218
397	hsa-miR-560	0.385665	0.628002	0.729376	0.845526	0.198333	0.195666	0.647142
398	hsa-miR-507	1.05231	0.655473	0.394628	0.507263	0.331011	0.287198	0.652418
399	hsa-miR-552	0.310543	0.776792	0.584017	0.94031	0.305998	0.270744	0.652915
400	hsa-miR-526a	0.418348	0.536462	0.334843	1.32471	0.515264	0.454992	0.65359
401	hsa-miR-548b	0.388196	0.565186	0.917962	0.747424	0.237084	0.228723	0.654692
402	hsa-miR-382	0.793443	0.717133	0.887625	0.229118	0.329236	0.293543	0.65683	validated
403	hsa-miR-485-3p	0.663316	0.774471	0.58642	0.609466	0.0231532	0.0838102	0.658418
404	hsa-miR-100	0.478616	0.388192	0.652978	1.1183	0.36452	0.324995	0.659521
405	hsa-miR-519a	0.297667	0.377539	0.40786	1.55842	0.602591	0.600499	0.660371
406	hsa-miR-323	0.827842	0.480286	0.726383	0.620544	0.095875	0.148745	0.663764
407	hsa-miR-510	0.738993	0.863132	0.51116	0.544927	0.120309	0.166147	0.664553
408	hsa-miR-368	0.964674	0.712523	0.260917	0.721747	0.310455	0.293579	0.664965
409	hsa-miR-658	0.64233	0.497964	0.73973	0.78616	0.0644657	0.12737	0.666546
410	hsa-miR-550	0.70531	0.657157	0.476262	0.835465	0.0903235	0.148679	0.668548
411	hsa-miR-557	0.828482	0.647352	0.661837	0.547189	0.0484096	0.11658	0.671215
412	hsa-miR-639	1.2808	0.394741	0.711058	0.319092	0.448357	0.437228	0.676423
413	hsa-miR-556	1.04763	0.369072	0.791108	0.504144	0.29475	0.302812	0.677989
414	hsa-miR-802	0.457421	0.635014	1.11599	0.506922	0.290493	0.300889	0.678837
415	hsa-miR-125a	0.506494	0.661892	0.679034	0.871333	0.0800102	0.14949	0.679688
416	hsa-miR-592	0.649867	0.378672	0.505494	1.19042	0.354993	0.357155	0.681112
417	hsa-miR-517b	0.429083	0.641644	0.793952	0.863455	0.134098	0.192401	0.682033
418	hsa-miR-345	0.80307	0.700109	0.564055	0.672723	0.0248974	0.0982299	0.684989
419	hsa-miR-671	0.818334	0.51142	0.783192	0.627157	0.0670429	0.142473	0.685026
420	hsa-miR-573	0.956566	0.392602	0.792086	0.604233	0.197959	0.243055	0.686372
421	hsa-miR-195	0.923975	0.371249	0.784934	0.666218	0.186673	0.235144	0.686594
422	hsa-miR-500	1.25023	0.307415	0.69665	0.493021	0.397845	0.407854	0.686829
423	hsa-miR-424	0.498352	0.378116	0.348271	1.52538	0.52571	0.562319	0.687529
424	hsa-miR-586	0.737996	0.500684	0.97156	0.540555	0.158362	0.215818	0.687699
425	hsa-miR-576	0.703569	0.548135	0.716615	0.784669	0.0250404	0.0999469	0.688247	validated
426	hsa-miR-373*	0.651686	0.990956	0.706095	0.404577	0.191444	0.240663	0.688329
427	hsa-miR-302d	0.769652	0.515752	0.761209	0.707401	0.0401303	0.118422	0.688504	validated
428	hsa-miR-93	1.08264	0.33103	0.982638	0.364215	0.380804	0.397826	0.69013
429	hsa-miR-566	1.0883	0.980932	0.299681	0.392375	0.384473	0.401753	0.690323
430	hsa-miR-519e	0.538409	0.767819	0.750781	0.723642	0.0271204	0.106074	0.695163	validated
431	hsa-miR-181d	0.323882	0.828615	1.27237	0.362249	0.415768	0.447081	0.696778
432	hsa-miR-519d	0.609735	0.644419	0.897416	0.677402	0.0407079	0.129758	0.707243
433	hsa-miR-484	0.806028	0.975184	0.369095	0.699703	0.174424	0.2555	0.712503
434	hsa-miR-506	0.975214	0.394611	1.0338	0.454493	0.26795	0.336579	0.71453
435	hsa-miR-633	1.20077	0.741161	0.441985	0.482574	0.27831	0.348904	0.716622
436	hsa-miR-302a*	0.472716	0.721223	1.20192	0.479703	0.266952	0.342118	0.71889
437	hsa-miR-346	0.417989	0.864043	0.722443	0.88198	0.115364	0.214625	0.721614	validated
438	hsa-miR-34b	0.480109	0.996117	0.570849	0.853131	0.14098	0.240594	0.725052
439	hsa-miR-34c	0.434996	0.846317	0.784197	0.862995	0.0912547	0.200968	0.732126
440	hsa-miR-486	0.996756	1.15982	0.339043	0.439344	0.309323	0.405455	0.733742
441	hsa-miR-662	0.894324	0.8623	0.596811	0.59746	0.0527342	0.162863	0.737724
442	hsa-miR-585	0.312874	0.640912	0.574609	1.43067	0.369954	0.481882	0.739766
443	hsa-miR-106a	0.794839	0.822807	0.465369	0.878079	0.0714845	0.186505	0.740273	validated
444	hsa-miR-371	0.411938	0.843186	0.822303	0.885434	0.103925	0.220752	0.740715	validated
445	hsa-miR-519b	0.453117	0.781471	0.689475	1.08158	0.133697	0.259957	0.751412	validated
446	hsa-miR-182*	0.930381	0.963803	0.516172	0.597487	0.10171	0.228159	0.751961
447	hsa-miR-106b	0.489684	0.990562	0.591954	0.958059	0.121971	0.254082	0.757565
448	hsa-miR-181c	1.27146	0.769641	0.55464	0.457593	0.224169	0.362981	0.763334
449	hsa-miR-200a*	0.933532	0.437487	0.862071	0.825628	0.0870881	0.222685	0.764679
450	hsa-miR-508	0.68179	0.859309	0.686482	0.855581	0.00937468	0.10009	0.770791
451	hsa-miR-32	0.799404	0.759058	0.892507	0.6389	0.0107816	0.105127	0.772467
452	hsa-miR-525	0.282875	0.404215	0.262482	2.14152	0.575346	0.91464	0.772773
453	hsa-miR-302c	1.31258	0.623043	0.599765	0.556387	0.210128	0.360814	0.772943
454	hsa-miR-380-5p	1.20156	0.853768	0.312121	0.834883	0.18482	0.366689	0.800583	validated
455	hsa-miR-487a	1.06696	1.02387	0.726411	0.390537	0.137023	0.313286	0.801944
456	hsa-miR-19b	0.661888	1.10928	0.437108	1.03036	0.132713	0.315761	0.809661	validated
457	hsa-miR-512-3p	1.05649	0.512416	0.862908	0.85013	0.0591003	0.226041	0.820486	validated
458	hsa-miR-196a	0.770129	0.61442	0.738084	1.18221	0.0698628	0.246646	0.826211	validated
459	hsa-miR-642	0.835852	0.655771	1.04221	0.77194	0.0237676	0.162012	0.826443
460	hsa-miR-302a	0.786524	0.997423	0.455821	1.11532	0.0923759	0.289269	0.838772	validated
461	hsa-miR-493-3p	0.774896	1.03104	0.649012	0.989814	0.0246771	0.18061	0.861191	validated
462	hsa-miR-515-3p	0.622519	0.767059	0.80654	1.27767	0.0739782	0.284053	0.868448
463	hsa-miR-551b	1.15339	1.10883	0.570406	0.657757	0.0824843	0.301178	0.872595
464	hsa-miR-372	0.957941	1.5055	0.648144	0.427522	0.186669	0.467522	0.884778
465	hsa-miR-504	1.4997	1.05344	0.312449	0.824332	0.175453	0.494	0.922481	validated
466	hsa-miR-517a	1.17278	0.915704	0.688744	0.951084	0.0199411	0.198139	0.932078	validated
467	hsa-miR-555	1.08171	0.750271	0.477979	1.43388	0.117823	0.413678	0.935958	validated
468	hsa-miR-34a	1.19968	0.740239	1.00631	0.834591	0.0195106	0.20227	0.945206
469	hsa-miR-619	0.57162	0.423554	0.288034	2.59688	0.440345	1.09074	0.970022
470	hsa-miR-511	0.969504	1.28356	0.627652	1.30694	0.0387946	0.319056	1.04691	validated
	AVERAGE	0.490528	0.511164	0.474172	0.468814	0.35565	0.166514	0.480898
	STDEV	0.253101	0.234578	0.221675	0.250504	0.316295	0.109229	0.154131
